# Supplementary material
Source: publisher figshare collection journal article supplement (https://acs.figshare.com/ndownloader/files/27368478)
Supplement: Supplementary file 1 [file 27368478]

## Supporting Information

# Chamberless NDIR CO<sub>2</sub> Sensor Robust against Environmental Fluctuations

**Mostafa Vafaei and Amir Amini\***

Department of Electrical Engineering, College of Technical and Engineering, West Tehran Branch,  
Islamic Azad University, Tehran, Iran.

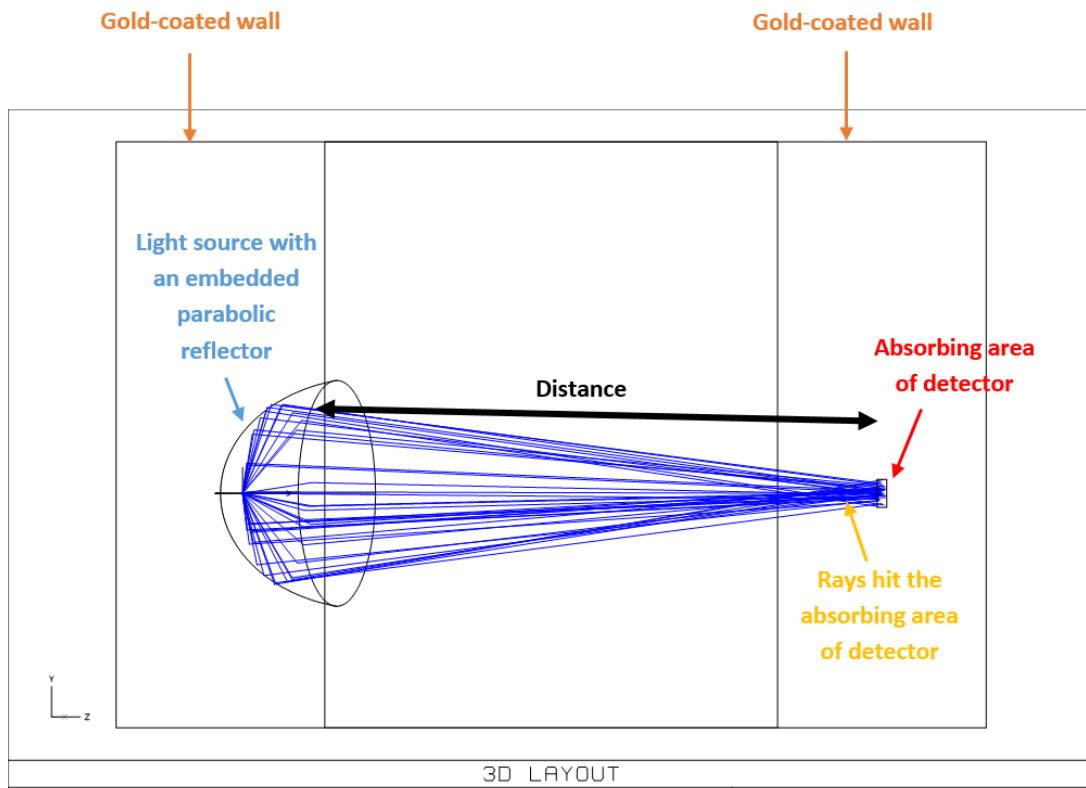

Fig.S1. Drawing of Zemax ray tracing simulation for chamberless sensor.

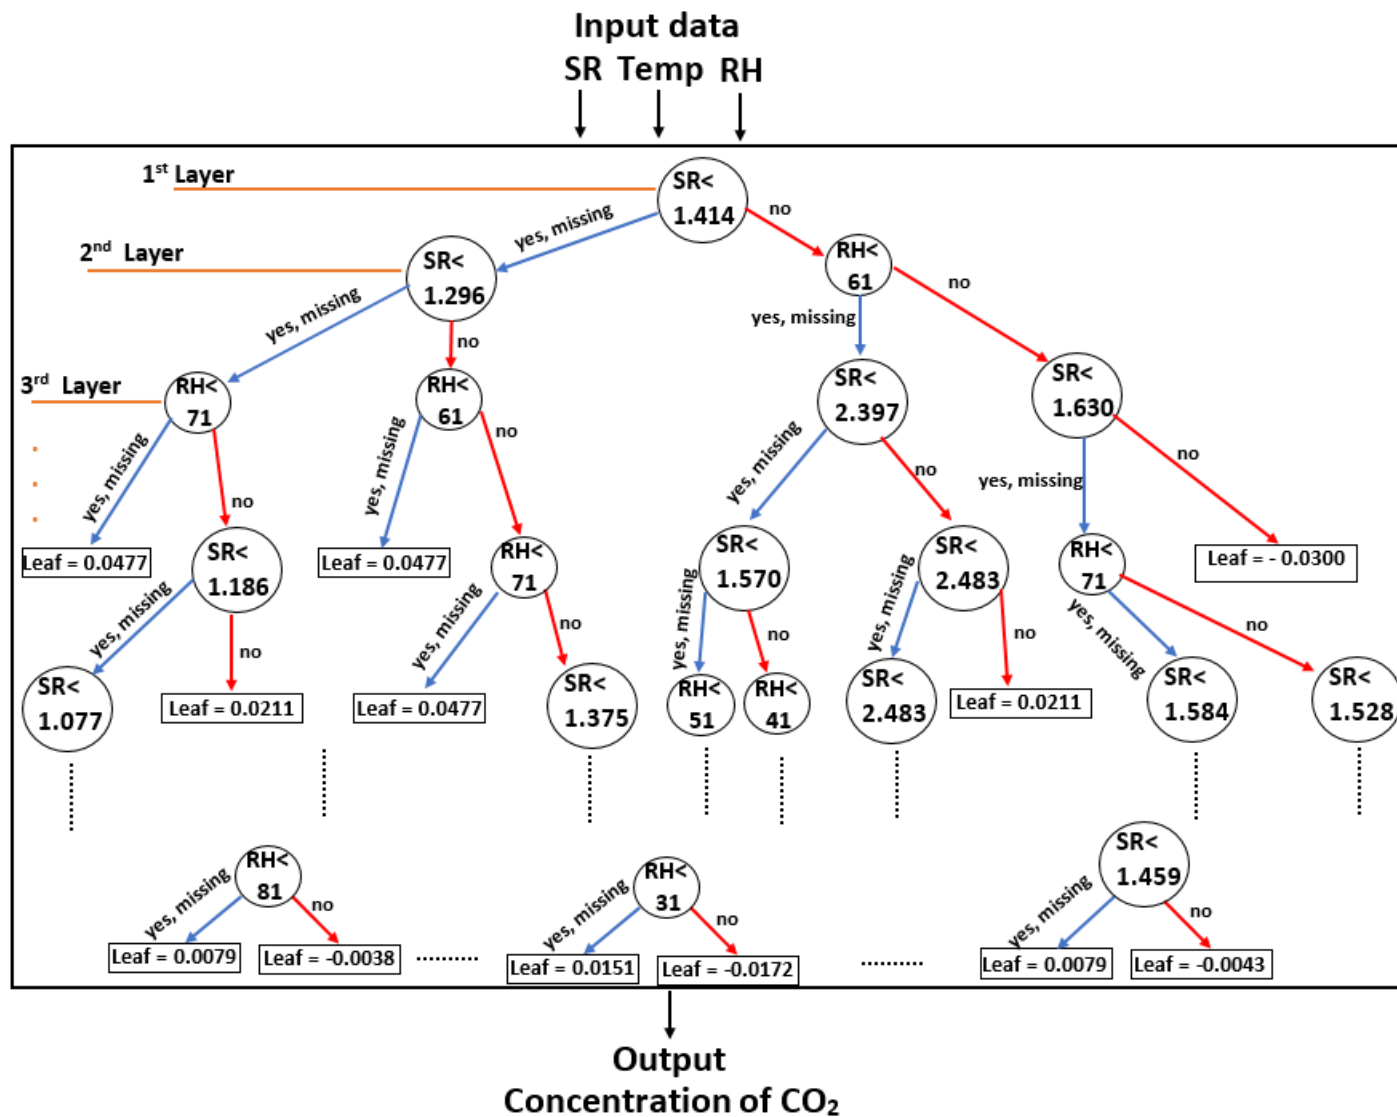

Fig. S2. The MISO model showing the three inputs, the created decision tree by the XGBoost algorithm, and the output. The dashed lines in the figure show that the presented decision tree is a shortened version. The first, second, and third layers of tree are shown.

Table S1  
Simulation results of total hits and total power for NDIR  
sensor in 4 different distances.

| Distance (mm) | Total Hits (#) | Total Power (mW) |
|---------------|----------------|------------------|
| 10            | 835            | 1.95             |
| 20            | 26028          | 59.17            |
| 30            | 16496          | 37.51            |
| 40            | 5538           | 12.27            |

Table S2  
Comparison of 5 commercial CO<sub>2</sub> gas sensor with the  
current proposed sensor.

| Sensor name / ref       | Measurement Range (ppm) | Accuracy              | Response time (T <sub>90</sub> )                 | Working RH range (%)                                              | Working Temp range (°C) | Design structure                                                                                                                                              | Compensation Temp & RH | Self-heating |
|-------------------------|-------------------------|-----------------------|--------------------------------------------------|-------------------------------------------------------------------|-------------------------|---------------------------------------------------------------------------------------------------------------------------------------------------------------|------------------------|--------------|
| GUARDIAN® NG [1]        | 0-3000                  | ±2% of full scale     | = <30                                            | 0-95                                                              | Not Available.          | <ul style="list-style-type: none"> <li>Equipped with a tube in its input sample line that might be condensed.</li> <li>Dual wavelength technology.</li> </ul> | No                     | Yes          |
| SPECIAL GUARDIAN NG [1] | 0 – 1000                | ±10% range            | Variable (determined by bit switch and firmware) | Sensitive to large changes in humidity depending on gas and range | 0 - 45                  | <ul style="list-style-type: none"> <li>Equipped with a tube in its input sample line that might be condensed.</li> <li>Dual wavelength technology.</li> </ul> | No                     | Yes          |
| smartGAS BASICEVO [2]   | 0-10000                 | Not available         | appr. 60 s                                       | 0-95                                                              | -10 - 40                | <ul style="list-style-type: none"> <li>Dual beam and dual wavelength.</li> </ul>                                                                              | No                     | Yes          |
| smartGAS FLOWEVO [2]    | 0-10000                 | Not available         | ≤ 9.9 s                                          | 0-95                                                              | 0 - 50                  | <ul style="list-style-type: none"> <li>Dual beam and dual wavelength.</li> </ul>                                                                              | No                     | Yes          |
| Semeatech IRM300SS [3]  | 0-5000                  | ±50ppm<br>±5% reading | 60 s                                             | 0-95                                                              | 0 -50                   | Single wavelength                                                                                                                                             | No                     | Yes          |
| Current Sensor          | 400-2200                | ~ ± 1% of full scale  | 60 s                                             | 15-85                                                             | 25-50                   | <ul style="list-style-type: none"> <li>Single beam and single wavelength.</li> <li>Drift-like compensation for RH and Temp.</li> </ul>                        | Yes                    | No           |

## References:

- [1] E. Sensors, Accessed: Feb. 1, 2021. [Online]. Available: <https://edinburghsensors.com/>.
- [2] smartGas., Accessed: Feb. 1, 2021. [Online]. Available: <https://www.smartgas.eu/en/>.
- [3] SemeaTech, Accessed: Feb. 1, 2021. [Online]. Available: <http://semeatech.com/m/view.php?aid=193>.
